# Supplementary material
Source: publisher figshare collection journal article supplement (https://acs.figshare.com/ndownloader/files/3787246)
Supplement: Supplementary file 1 [file 3787246]

**Theoretical Strategy To Design Novel n-Type Copolymers  
Based on Anthracene Diimide and Pyrido[2,3-g]quinoline  
Diimide for Organic Solar Cells**

**Zhiyong Fu, Wei Shen, Xiaoqin Tang, Min He, Rongxing He and Ming Li\***

College of Chemistry and Chemical Engineering, Southwest University, Chongqing  
400715, People's Republic of China

---

\* Corresponding author. E-mail: liming@swu.edu.cn

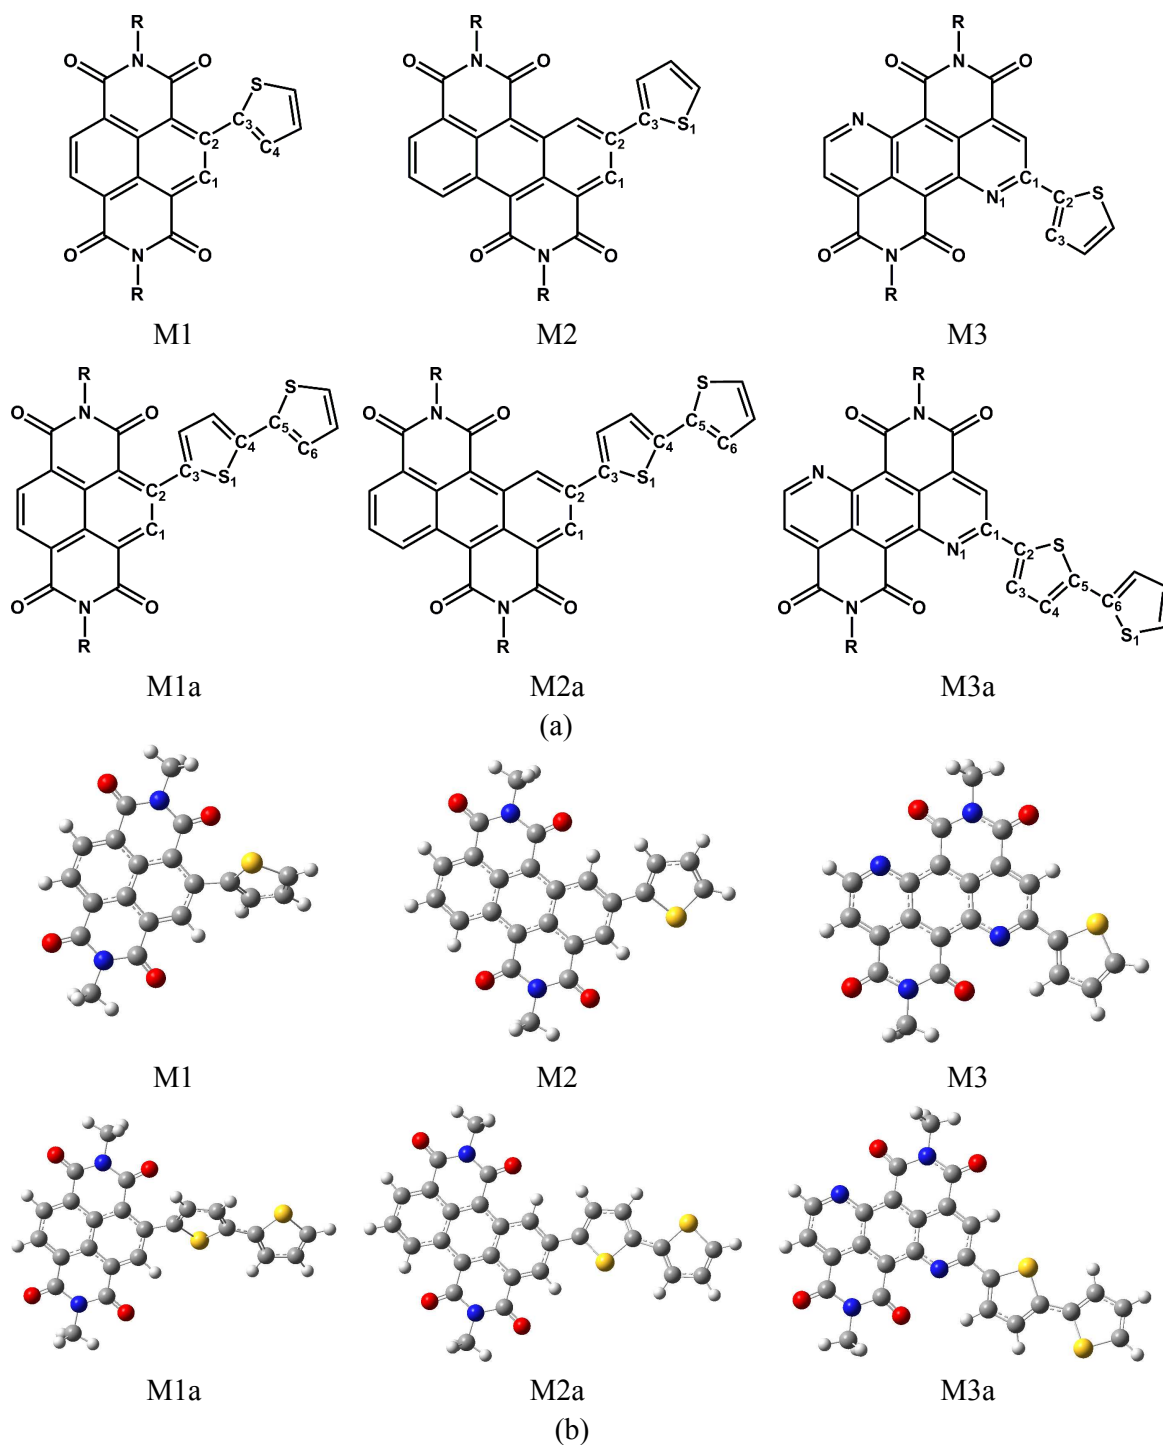

**Figure S1.** (a) Sketch structures (R = CH<sub>3</sub>) and names of monomer models (M1-M3, M1a-M3a) and (b) 3D models of M1-M3, M1a-M3a.

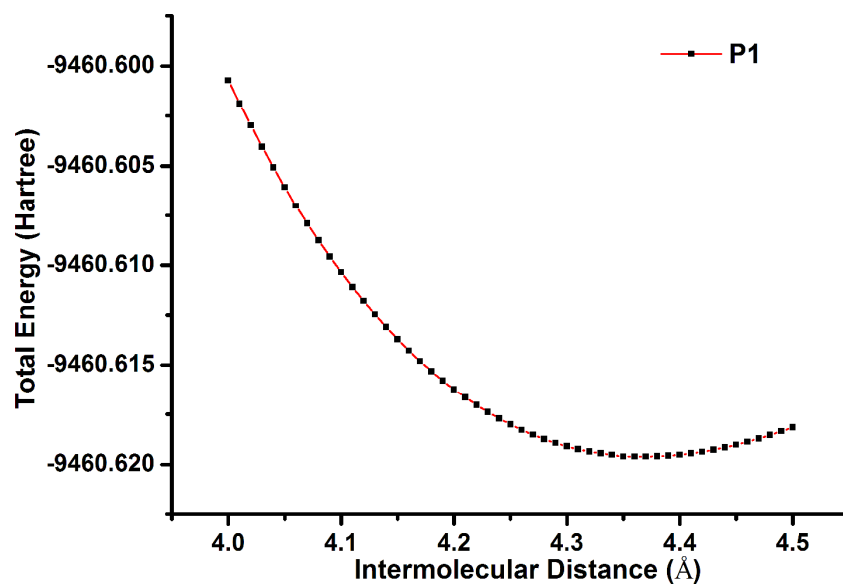

(a)

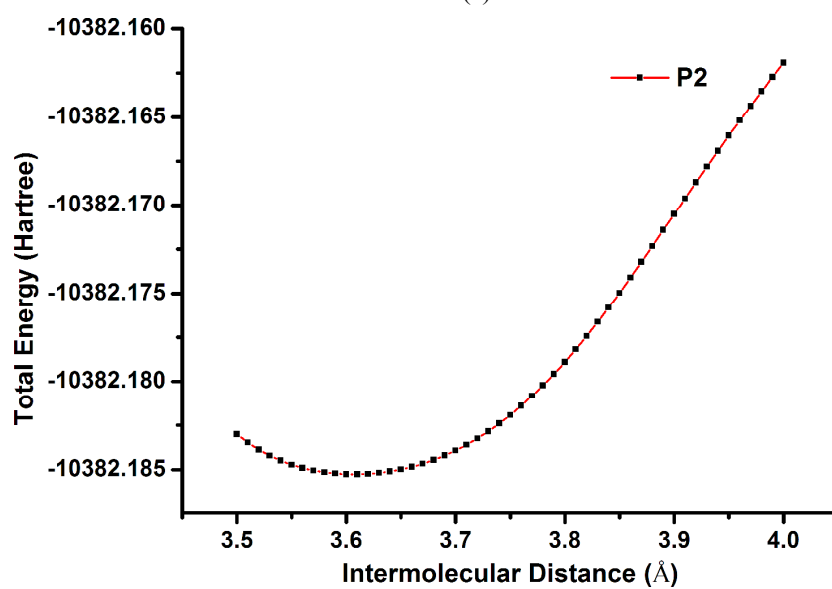

(b)

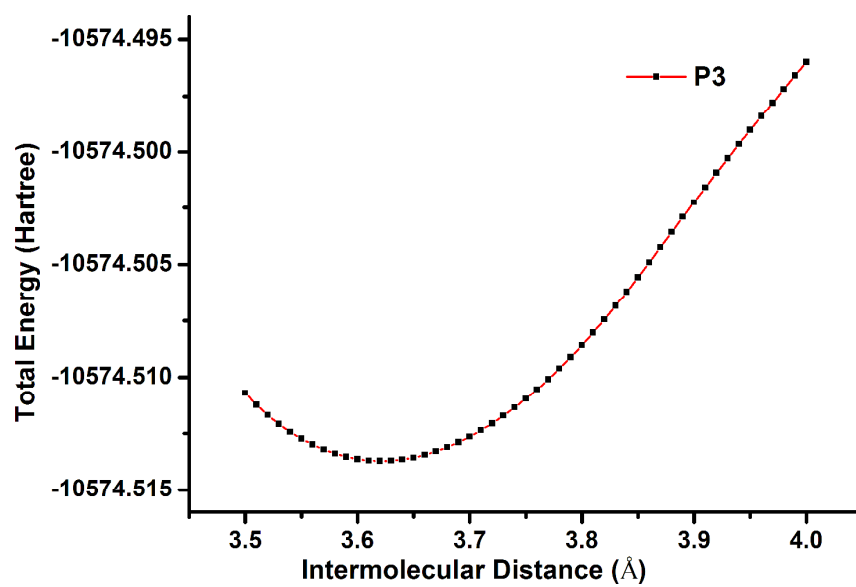

(c)

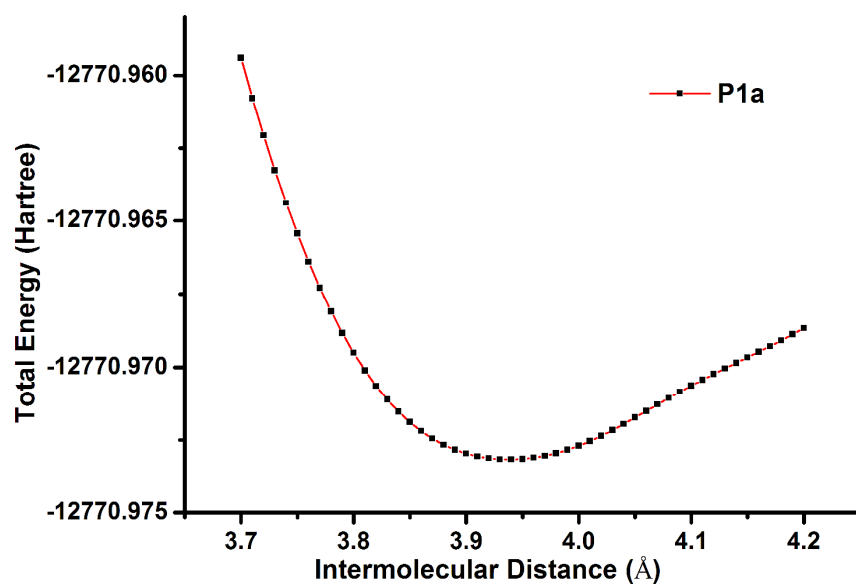

(d)

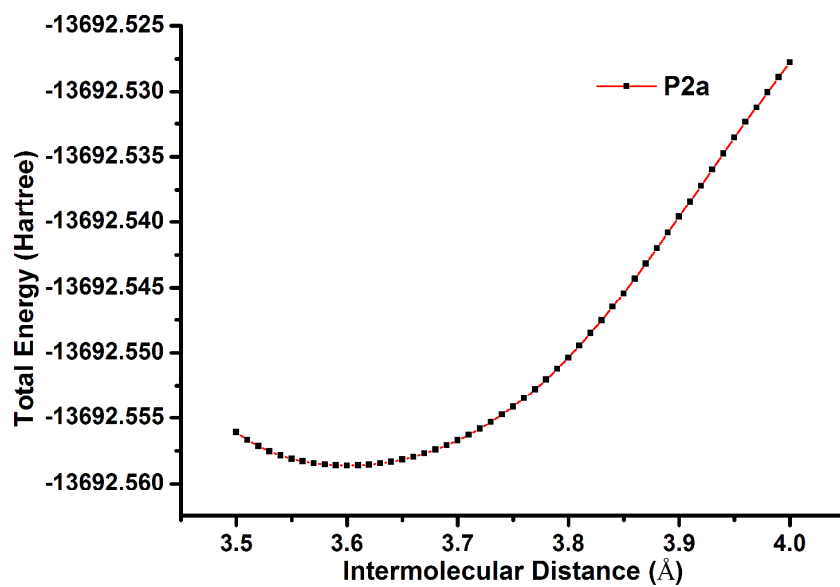

(e)

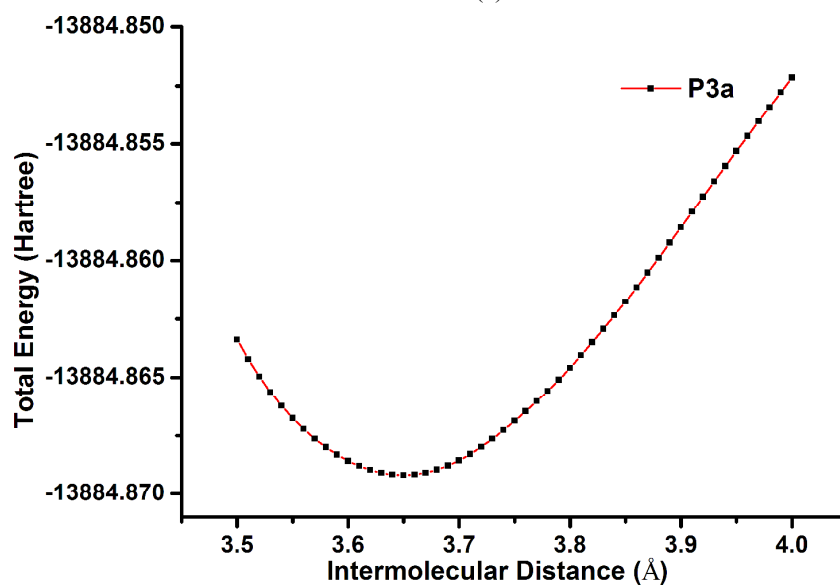

(f)

**Figure S2.** The calculated total energies of two adjacent trimers (P1 (a), P2 (b), P3 (c), P1a (d), P2a (e) and P3a (f)) as the function of intermolecular distance (scanning step length is 0.01 Å)

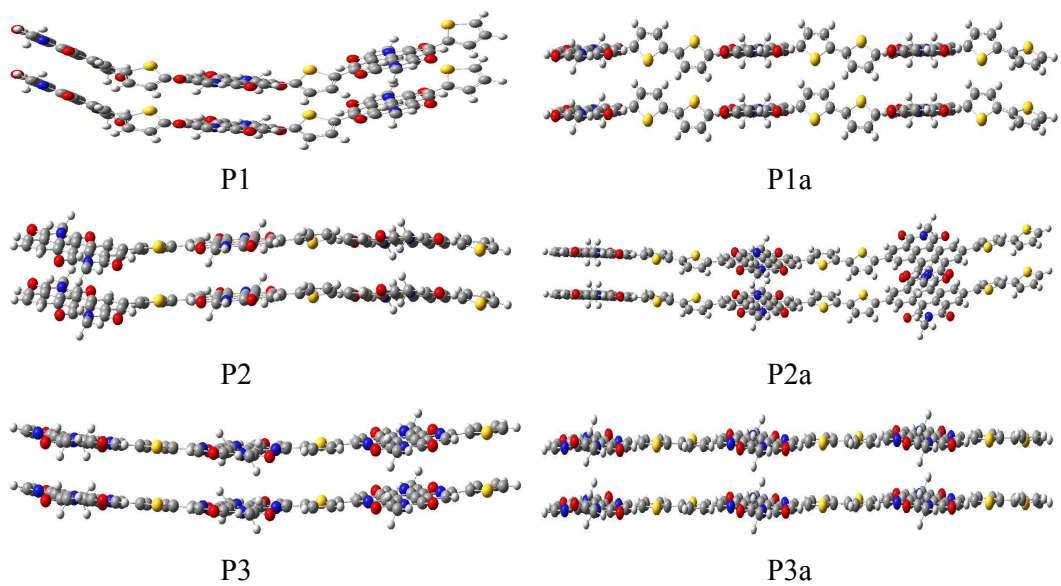

**Figure S3.** 3D models of two adjacent fragments of those copolymers
